# Supplementary figures and images for: DOX-loaded peptide dendritic copolymer nanoparticles for combating multidrug resistance by regulating the lysosomal pathway of apoptosis in breast cancer cells
Source: Royal Society of Chemistry journal article supplement (doi:10.1039/c9tb02130b), 2020-01-01

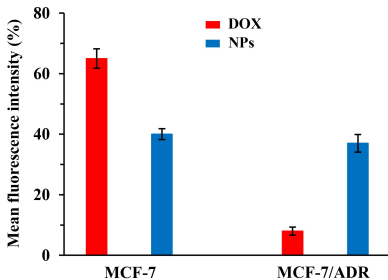

Supplement: c9tb02130b2.pdf [file c9tb02130b2.pdf]

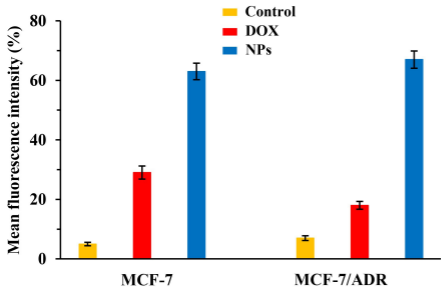

Supplement: c9tb02130b3.pdf [file c9tb02130b3.pdf]
